# Supplementary material
Source: ML conference proceedings conference paper supplement (https://proceedings.neurips.cc/paper_files/paper/2022/hash/974ff7b5bf08dbf9400b5d599a39c77f-Abstract.html)
Supplement: Supplementary file 1 [file 974ff7b5bf08dbf9400b5d599a39c77f-Supplemental-Conference.pdf]

An extended version of this paper with additional results and proofs is available at <https://arxiv.org/abs/2206.09642>.
